# Supplementary material for: An estimate of anthropogenic CO 2 inventory from decadal changes in oceanic carbon content
Source: HighWire-hosted journal article supplement (doi:10.1073/pnas.0606574104), 2007-02-21
Supplement: 06574Table2.pdf [file 06574Table2.pdf]

**Table 2. Summary of the Monte Carlo simulations**

|                    | Depth (m) | Exp.1 |       | Exp.2 |       | Exp.3 |       | Exp. 4 |       | Exp.5/1 |       | Exp. 5/2 |       |
|--------------------|-----------|-------|-------|-------|-------|-------|-------|--------|-------|---------|-------|----------|-------|
|                    |           | bias  | prec. | bias  | prec. | bias  | prec. | bias   | prec. | bias    | prec. | bias     | prec. |
| <b>East. Basin</b> | 0-1000    | -0.18 | 0.66  | -2.33 | 0.75  | 2.62  | 0.66  | -0.26  | 0.61  | -2.33   | 1.46  | 1.58     | 12.5  |
|                    | 1000-2000 | 0.08  | 0.71  | -2.20 | 0.79  | 2.86  | 0.72  | -0.13  | 0.65  | 4.32    | 1.47  | -4.83    | 12.6  |
|                    | 2000-3000 | 0.89  | 0.68  | -1.53 | 0.75  | 3.40  | 0.66  | 0.18   | 0.65  | -0.59   | 1.95  | 1.69     | 11.1  |
|                    | 3000-6000 | 0.07  | 0.70  | -2.44 | 0.77  | 2.56  | 0.72  | -1.15  | 0.67  | 0.87    | 2.41  | -0.64    | 12.9  |
| <b>West. Basin</b> | 0-1000    | -0.16 | 0.31  | -4.36 | 0.37  | 0.59  | 0.29  | -0.18  | 0.30  | -0.19   | 0.78  | -0.67    | 4.4   |
|                    | 1000-2000 | -0.61 | 0.25  | -4.87 | 0.27  | 0.07  | 0.24  | -0.63  | 0.23  | -1.31   | 1.25  | -0.73    | 4.3   |
|                    | 2000-3000 | 1.50  | 0.24  | -2.76 | 0.24  | 2.17  | 0.23  | 1.49   | 0.22  | 1.60    | 0.94  | 1.90     | 3.7   |
|                    | 3000-6000 | 0.21  | 0.26  | -4.02 | 0.27  | 0.91  | 0.26  | 0.23   | 0.22  | 0.78    | 0.79  | -0.58    | 4.6   |

For the conditions in the different experiments, see text. The left hand columns are the means of the averaged differences (eMLR based estimate: “true”  $\Delta$ DIC) within a depth interval as a measure of the bias introduced to the data. The right hand columns are the means of the standard deviations of the differences within one depth interval, as a measure of the precision of the analysis, see Figs. 11 and 12.
